# 1 **Initiation of ensemble kinesin-3 motility is regulated by the rigidity of** 2 **cargo-motor attachment**

3

4 Prakash Lama<sup>1,2</sup> and Minhajuddin Sirajuddin<sup>1, #</sup>

5

6 1. Centre for Cardiovascular Biology and Disease, Institute for Stem Cell Science and  
7 Regenerative Medicine, GKVK Campus, Bengaluru – 560065, India

8 2. Manipal Academy of Higher Education, Manipal, India

9 # Address correspondence to M. Sirajuddin: minhaj@instem.res.in

10

## 11 **Abstract**

12 Intracellular cargo transport is powered by molecular motors that move on their  
13 respective filamentous tracks. A key component in this process is the tether between  
14 cargo and motor, which is often connected by long slender coiled-coils. Several studies  
15 have identified mechanisms that regulate cargo transport and can be broadly categorized  
16 into regulation of the motor ATPase activity by autoinhibition, cargo adapters and  
17 modifications in the cytoskeletal tracks. The regulatory effects of cargo-motor linkers  
18 have been described in kinesin-3 subfamily motors. However, the effects of cargo-motor  
19 linker rigidity on ensemble cargo transport has not been explored. Here we have built a  
20 DNA origami scaffold, which can be tethered with multiple kinesin-3 motors using either  
21 single or double-stranded DNA linkages, mimicking rigid versus flexible cargo-motor  
22 linkages. Using this system, we show that regardless of the motor numbers attached to the  
23 cargo, only linkers with a lesser degree of freedom allow motors to engage with  
24 microtubule tracks. Together, our work identifies that the rigidity of cargo-motor linkages  
25 influences motor motility. This opens up the possibilities to identify new factors that can  
26 influence the rigidity of cargo-motor linkages that in turn can regulate intracellular cargo  
27 transport.

28

29

30

## 31 **Introduction**

32 Molecular motors belonging to the kinesin superfamily require three important  
33 components for their cellular function; the motor domain, coiled-coil helices and the  
34 terminal cargo binding domain (Sweeney and Holzbaur, 2018). The kinesin motor  
35 domain interacts with the microtubules, which in turn stimulates ATP turnover and the  
36 ATP hydrolyzing activity is converted into the mechanical force required for motility.  
37 Modulation of ATPase activity (Gennerich and Vale, 2009), sequestration of the motor  
38 domain (Hammond et al., 2010; Imanishi et al., 2006; Toropova et al., 2017; Ren et al.,  
39 2018) and modifications in the microtubule tracks (Sirajuddin et al., 2014; Lessard et al.,  
40 2019; McKenney et al., 2016; Monroy et al., 2020) are well-known regulatory  
41 mechanisms that govern kinesin motility. The cargo binding domain of a typical kinesin  
42 motor is located at the distal end of the motor domain. In many cases, the sequestration of  
43 motor domain is mediated by the cargo binding domain leading to an autoinhibitory state.  
44 This autoinhibition can be relieved by cognate cargo adapters, thereby ensuring fidelity  
45 and minimizing futile ATPase cycles during intracellular transport (Siddiqui and Straube,  
46 2017). The third component in kinesin molecular motors are the tethers that connect  
47 motor domain and cargo binding domain. These tethers are often dimeric coiled-coil  
48 helices that span several hundreds of amino acids, thus rendering a single kinesin  
49 molecular motor dimeric in nature (Hirokawa et al., 2009b). The slender coiled coil  
50 domain also contains several breaks making them flexible, thereby providing several  
51 degrees of freedom to the kinesin motor during cargo transport.

52  
53 Among the kinesin superfamily of motors, members of the kinesin-3 subfamily such as  
54 KIF1A, KIF13B and KIF16 are known to be regulated by the flexible parts of the coiled  
55 coil domain (Soppina et al., 2014). Using single molecule and engineered kinesin-3  
56 motors it was inferred that the flexibility of the hinge region between NC and CC1  
57 domains is important for dimerization and subsequent motility of kinesin-3 motors  
58 (Soppina et al., 2014; Huo et al., 2012). The dimerization requirement for kinesin-3  
59 processive motility was a contentious notion (Okada and Hirokawa, 1999; Hirokawa et  
60 al., 2009a), which has been sufficiently addressed by several independent studies  
61 (Soppina et al., 2014; Hammond et al., 2009; Tomishige et al., 2002). The current model

62 suggests that dimerization of kinesin-3 motors leads to super-processive motility i.e.,  
63 their ability to walk long distances along the microtubules (Soppina et al., 2014;  
64 Scarabelli et al., 2015; Siddiqui and Straube, 2017). The super-processive property of  
65 kinesin-3 motors have been attributed to the lysine rich loop (K-loop) in the motor  
66 domain (Soppina and Verhey, 2014). The basic charge of K-loop mediates electrostatic  
67 interaction with the acidic carboxy-terminal tails of tubulin, thus increasing the  
68 processive motility of kinesin-3 motors. A recent study has also shown that  
69 multimerization of kinesin-3 monomers can also result in cargo transport (Schimert et al.,  
70 2019). While tremendous progress has been achieved in understanding kinesin-3 motors  
71 and their motility at the single-molecule level, the regulatory aspects of multiple kinesin-  
72 3 motors have not been explored. In fact, the conventional method to study molecular  
73 motors and their regulation has been an endeavor that majorly involves purified  
74 molecular motors and studying them at the single-molecule level. However, molecular  
75 motors often work in teams with varying motor ensemble numbers. To study motor  
76 ensemble properties and probe the importance of the cargo-motor linker rigidity in  
77 ensemble conditions we designed a synthetic scaffold system. The DNA origami scaffold  
78 developed in this study can accommodate up to 28 motors, far exceeding the ensemble  
79 numbers achieved in previous studies (Toropova et al., 2017; Derr et al., 2012; Driller-  
80 Colangelo et al., 2016; Hariadi et al., 2015b; Furuta et al., 2013). Using this system, we  
81 probed the role of motor-cargo linkers and found that the initiation of kinesin-3 ensemble  
82 motility is dictated by the flexibility of the linkers. Thus, the DNA origami tool described  
83 here becomes a robust system that can be extended to study regulatory mechanisms of  
84 other molecular motors in their ensemble state.

85  
86  
87  
88  
89  
90

## 91 **Results**

### 92 **Design and validation of 6HB-400nm DNA origami scaffold**

93 Molecular motors have been extensively studied at the single molecule level, however  
94 while performing their cellular functions they often work in ensembles. Few studies have  
95 created synthetic DNA scaffolds to study motor ensembles and so far, the systems that  
96 exist can assemble maximum of 6 motors with regular spacing (Derr et al., 2012; Hariadi  
97 et al., 2015b). To expand the capabilities in studying motor ensembles, here we adapted a  
98 DNA origami scaffold that was designed earlier (Bui et al., 2010). The DNA origami  
99 scaffold used in this study is 400nm long with 6 helix bundles (6HB-400nm) (Methods)  
100 (Figure 1A & Supplementary Figure 1). The 6HB-400nm scaffold has been designed to  
101 accommodate up to 28 oligonucleotide-overhangs (called handles) in a linear stretch,  
102 each handle is spaced ~14nm apart (Supplementary Figure 1). The 6HB-400nm scaffold  
103 was validated to confirm its structure and occupancy of oligonucleotide handles using  
104 anti-handles conjugated with fluorescent molecules and motors at helix 1  
105 & 5 and helix 2 respectively (Methods) (Supplementary Table 1 & Supplementary Figure  
106 2A-D). For the protein attachment to the 6HB-400nm scaffold we designed two versions;  
107 A 40 and 20 base single-stranded oligonucleotide (anti-handle) that is covalently linked  
108 to the tail end of kinesin through SNAP-tag (Methods) (Supplementary Figure 3A & 3B).  
109 The 20 base oligonucleotides anti-handle is fully complementary to the handle sites  
110 emanating from the 6HB-400nm scaffold mimicking the rigid linker (Supplementary  
111 Figure 3C). In the case of 40 base oligonucleotides anti-handle, the complementarity is  
112 restricted only towards 20 basepairs at the 5' of the handle sites rendering them as  
113 flexible linkers. On the other hand, the handle oligonucleotides that are complementary to  
114 the anti-handles are also 40 base long of which 20 base towards the 3'/5' end (i.e.,  
115 towards the DNA scaffold) remain single-stranded (Supplementary Figure 3C). From  
116 hereafter we refer the 20 and 40 oligonucleotides protein-DNA scaffold attachment  
117 linkers as rigid and flexible linkers respectively (Supplementary Figure 3C).  
118  
119 Next, we established motor motility assays assessing the feasibility of the 6HB-400nm  
120 scaffold to study the ensemble motor behavior. Briefly, KIF1A motors were covalently  
121 linked to single-stranded DNA oligonucleotides (flexible and rigid anti-handles) that are



122 complementary to the handles present in the 6HB-400nm scaffold (Methods) (Figure 1C  
123 and Supplementary Figure 3A & 3B). To visualize the 6HB-400nm scaffolds in our  
124 motility assays, we labelled them using six fluorescent oligonucleotides that were  
125 attached to the fluorescent handles at helix 1 & 5 (Methods) (Figure 1A, Supplementary  
126 Figure 1 & Supplementary Table 1). In our motility assays, we compared the 6HB-  
127 400nm:28 KIF1A motors (ensemble motors) motility against individual KIF1A motors  
128 (Methods). Our results show that the velocity of 6HB-400nm:28 KIF1A ensemble and  
129 single KIF1A motors are  $1.27 \pm 0.39 \mu\text{m s}^{-1}$  and  $1.08 \pm 0.29 \mu\text{m s}^{-1}$  respectively (Figure 1D  
130 & 1E) (Supplementary Table 2). In the case of processivity, the 6HB-400nm:16 KIF1A  
131 ensembles and single KIF1A motors are near identical (Figure 1F) (Supplementary Table  
132 1). From this experiment we conclude that the 6HB-400nm scaffold can serve as a tool  
133 for characterizing motor ensemble properties.

134

### 135 **Motility properties of KIF1A motor ensembles**

136 Full-length Kinesin-3 motors can exist as monomeric units and homodimers in cells,  
137 single-molecule studies have suggested that the dimeric KIF1A motors are super-  
138 processive (Soppina et al., 2014; Tomishige et al., 2002). However, a quantitative  
139 comparison of monomer versus dimer KIFA ensembles is yet to be characterized.  
140 Moreover, the flexibility of cargo-motor linkers in an ensemble setting has not been  
141 explored. In order to test this, we compared the ensemble motility properties of dimeric  
142 and monomeric KIF1A tethered to 6HB-400nm scaffold, hereafter called as 6HB-400nm  
143 monomer KIFA and dimer KIF1A ensembles respectively (Methods) (Supplementary  
144 Figure 3A). We chose four different ensemble numbers in this study; 28, 16, 8 and 4  
145 motor attachment handle sites, which we hereafter refer to as 28H, 16H, 8H and 4H  
146 respectively (Methods). The 6HB-400nm:KIF1A dimer ensembles with varying handle  
147 sites and linkers were analyzed in an agarose gel to confirm the extent of DNA:motor  
148 complex formation (Methods) (Figure 1C, Supplementary Figure 3E & 3F).

149

150 From the motility assays, we could record individual 6HB-400nm:KIF1A ensembles  
151 moving along the microtubules, regardless of the KIF1A oligomeric state, ensemble  
152 number and the nature of linkers. Upon quantification of velocity and processivity values,

153 deviations between different 6HB-400nm:KIF1A ensembles began to emerge (Figure 2 &  
154 Supplementary Figure 4 & 5). The velocities within monomer and dimer KIF1A  
155 ensemble cohorts does not change with motor number. However, the velocity between  
156 monomer and dimer KIF1A rigid ensembles are two-fold different; for 6HB-400nm: 4-  
157 28H dimer and monomer KIF1A rigid ensembles the average velocity is  $\sim 2 \mu\text{m s}^{-1}$  and  
158  $\sim 0.9 \mu\text{m s}^{-1}$  respectively (Figure 2A, Supplementary Figure 4 & Supplementary Table 2).  
159 Compared to the KIF1A monomer rigid ensembles the flexible cohort exhibited two-fold  
160 reduction in velocity (Figure 2A, Supplementary Figure 4 & Supplementary Table 2). In  
161 contrast, the processivity values follow similar trend between monomer rigid, monomer  
162 flexible and dimer rigid ensembles (Figure 2B, Supplementary Figure 4 & Supplementary  
163 Table 2). A puzzling phenomenon here is the poor processivity of KIF1A ensembles  
164 below 16H. The 6HB-400nm-4H and 8H KIF1A dimer processivity is  $4.96 \pm 0.01 \mu\text{m}$  and  
165  $4.95 \pm 0.01 \mu\text{m}$  respectively. We attribute this low processivity of 6HB-400nm-4H & 8H  
166 KIF1A dimer ensembles to the high magnesium concentration used in our motility  
167 assays. High magnesium levels are required to overcome the magnesium quenching  
168 property of 6HB-400nm DNA scaffolds and therefore balancing the requirement of  
169  $\text{Mg}^{2+}$  ions for motor ATPase activity (Methods). Indeed, when high magnesium is used  
170 in motility assays the single dimeric KIF1A also exhibits poor processivity of  $3.46 \pm 0.01$   
171  $\mu\text{m}$  (Figure 1E & Supplementary Table 2). We also observed that the high magnesium  
172 induced low processivity can be overcome by higher motor ensembles. For example, the  
173 processivity of 6HB-400nm dimer KIF1A rigid 16H and 28H ensembles are  $12.2 \pm 0.01$   
174  $\mu\text{m}$  and  $7.2 \pm 0.01 \mu\text{m}$  respectively and is similar to the dimeric KIF1A processivity  
175  $9.8 \pm 0.01 \mu\text{m}$  (Supplementary Table 2).

176

177 In summary, the velocity of KIF1A ensembles remains unaffected regardless of the motor  
178 number and the processivity of KIF1A ensembles improves as the motor number  
179 increases.

180

### 181 **Comparative analysis of flexible versus rigid cargo-motor linkers**

182 While the velocity and processivity of flexible versus rigid cargo-motor linkers in  
183 ensembles remain largely unchanged, we observed reduced number of 6HB-400nm

184 KIF1A monomer ensembles with flexible linkers encountering the microtubule  
185 (Supplementary Movie 1). To gain more insights, we qualitatively assessed the ability of  
186 flexible and rigid linked 6HB-400nm KIF1A monomer ensembles binding microtubules  
187 in the absence of ATP, a microtubule strong binding condition called rigor-state  
188 (Methods). The rigor-state assays exemplify our observation that the 6HB-400nm KIF1A  
189 monomer ensembles with flexible linkers show reduced binding to the microtubules  
190 (Figure 3). In order to systematically probe the cargo-motor linkers, we additionally  
191 generated linkers that have single-stranded stretch at the either end of scaffold or motor  
192 tail, called intermediate flexible linkers (Methods) (Supplementary Table 1). In the rigor-  
193 state assays the 6HB-400nm KIF1A monomer ensembles linked with intermediate  
194 flexible linkers also showed a marked decrease in microtubule binding (Figure 3). The  
195 reduced binding of 6HB-400nm KIF1A monomer ensembles is a recurring phenomenon  
196 regardless of motor number sampled in our assays (Figure 3 & Supplementary Figure 6).  
197  
198 Next, we reasoned whether the reduced microtubule-binding ability of 6HB-400nm  
199 KIF1A monomer ensembles with flexible linkers could be rescued. For which we  
200 designed rescue oligonucleotides that can basepair with the single-stranded stretches in  
201 the flexible linkers (Methods) (Figure 3, Supplementary Figure 6 & Supplementary Table  
202 1). The rigor-state assays were performed in the absence and presence of rescue  
203 oligonucleotides for flexible 6HB-400nm monomer KIF1A ensembles (Methods).  
204 Remarkably, the microtubule-binding of 6HB-400nm KIF1A monomer ensembles with  
205 the flexible linkers was restored upon the addition of rescue oligonucleotides (Figure 3).  
206 The microtubule-binding rescue was observed with 16H also, however, the effects were  
207 more pronounced with 8H (Figure 3 & Supplementary Figure 6). To establish whether  
208 the rescue is specific, we performed the rigor-state rescue experiments in the presence of  
209 a scrambled oligonucleotides (Supplementary Table 1). In comparison to the rescue  
210 oligonucleotides that have complementarity to the flexible linkers the scrambled  
211 oligonucleotides did not show any improvement in microtubule-binding of 6HB-400nm  
212 KIF1A monomer ensembles (Figure 3 & Supplementary Figure 6). These experiments  
213 conclusively demonstrate that the microtubule-binding of KIF1A monomer ensembles  
214 can be regulated by the stiffness of the cargo-motor linker.

215

## 216 **Initiation of KIF1A ensemble motility is sensitive to the rigidity of DNA linkers**

217 The above rescue experiments were performed in the rigor-state. To assess the functional  
218 significance of cargo-motor linker flexibility, we next performed experiments in the  
219 presence of ATP (Methods). In addition to the velocity and processivity values, we  
220 measured the binding frequency of flexible 6HB-400nm KIF1A monomer ensembles  
221 with and without the rescue oligonucleotides (Methods). The velocity and processivity  
222 values of flexible 6HB-400nm KIF1A monomer ensembles do not change upon addition  
223 of rescue oligonucleotides (Figure 4A, Supplementary Figure 7 & Supplementary Table  
224 1), similar to our results with flexible versus rigid linkers (Figure 2). However, we  
225 observed a marked decrease in landing frequency with the flexible 6HB-400nm KIF1A  
226 monomer ensembles (Figure 4B). The landing frequency rate of flexible 6HB-400nm 4H,  
227 8H and 16H KIF1A ensembles are 0.004, 0.001 and 0.007  $\mu\text{m}^{-1} \text{s}^{-1}$  respectively. Similar  
228 to the rigor-state experiments, we performed the motility experiments with flexible 6HB-  
229 400nm KIF1A monomer ensembles in the presence of rescue oligonucleotides  
230 (Methods). The number of flexible 6HB-400nm KIF1A monomer ensemble particles  
231 moving on the microtubules markedly increases with rescue oligonucleotides  
232 (Supplementary Movie 1). Upon quantification, the landing-frequency of flexible 6HB-  
233 400nm KIF1A monomer ensembles significantly increases with the addition of rescue  
234 oligonucleotides in the motility assays (Figure 4B & Supplementary Figure 7). The  
235 landing frequencies of rescued 6HB-400nm 4H, 8H and 16H KIF1A monomer ensembles  
236 are 0.011, 0.073 and 0.059  $\mu\text{m}^{-1} \text{s}^{-1}$  respectively. We also observed the improvement in  
237 landing frequency is specific to the rescue oligonucleotides that are complimentary to the  
238 single-stranded DNA linkers. Combinedly these experiments suggest that the initiation of  
239 KIF1A ensembles motility is sensitive to the rigidity of the linkers between the  
240 6HB400nm scaffold and motors.

241

242

243

244

245

## 246 **Discussion**

247 Majority of the motor regulation studies have been performed using purified components  
248 of single or individual motor proteins. There are a few exceptions where the tug-of-war  
249 between two opposing motors have been described (Derr et al., 2012; Hariadi et al.,  
250 2015b; Toropova et al., 2017; Driller-Colangelo et al., 2016; Furuta et al., 2013).  
251 However, the regulatory aspects of ensemble motors have been poorly described, for  
252 instance the effects of cargo-motor linker flexibility towards ensemble kinesin-3 motility  
253 is unknown. Similarly, the ensemble motor experiments so far has been limited to DNA  
254 origami scaffolds with six motors. On the other hand, DNA scaffolds that can  
255 accommodate hundreds of motors has been described. However, it can only control the  
256 spacing between each motor thus limiting the ability to control the motor ensemble  
257 numbers (Hariadi et al., 2015a). Molecular motors that work together have their ensemble  
258 number in varying orders. For example, the motor ensemble numbers involved in the  
259 intracellular and intraflagellar cargo transport can range from 2 – 20 (Hirokawa et al.,  
260 2009b; Rai et al., 2016; Siddiqui and Straube, 2017; Prevo et al., 2017), and in the  
261 sarcomere more than 50 muscle myosins can engage during muscle contraction (Spudich,  
262 2014). In order to expand the capabilities to understand the molecular motor ensembles in  
263 this study we have designed and validated a 6HB-400nm DNA origami scaffold. The  
264 6HB-400nm DNA origami scaffold also acts as a cargo mimic, where the cargo-motor  
265 linkers are amenable for varying degrees of flexibility. Therefore, the 6HB-400nm DNA  
266 origami scaffold described here offers versatility to study molecular motor ensembles up  
267 to 28 molecules.

268  
269 Using 6HB-400nm DNA origami scaffold as a cargo, we tethered them with the KIF1A  
270 motors with varying ensemble motor numbers and linker flexibilities. From our assays  
271 we show that the biochemical properties of the KIF1A motors does not get affected as  
272 evident from the velocity and processivity values between rigid and flexible linkers.  
273 However, a striking observation emerged from these assays is the inability of KIF1A  
274 monomer ensembles to initiate motility when tethered to 6HB-400nm with flexible  
275 linkers (Figure 3 and 4). We also unequivocally show that the effects of flexible linkers  
276 can be reversed by the addition of oligonucleotides that are complementary to the flexible

277 single-strand DNA linkers i.e., the flexible linkers (Figure 3 and 4). We attribute the  
278 mechanism of diminished microtubule-binding of KIF1A ensembles with flexible linkers  
279 to its autoinhibited state mediated by the K-loop. In the case where the 6HB-400nm  
280 KIF1A monomer ensembles tethered with flexible oligonucleotides, the motor domain  
281 can adopt several degrees of conformation with respect to the 6HB-400nm scaffold. This  
282 might be conducive for an electrostatic interaction between the negatively charged DNA  
283 strands of 6HB-400nm and the positively charged K-loop of KIF1A motor domain. Upon  
284 addition of the rescue oligonucleotides complementary to the flexible regions the  
285 persistence of the linkers decreases. Thus, the motor domain may remain with a restricted  
286 degree of conformational flexibility and no electrostatic interaction between K-loop and  
287 6HB-400nm DNA elements.

288

289 The K-loop of kinesin-3 motors is a unique element that has been shown to enhance the  
290 processivity among this subfamily of kinesin motors (Soppina and Verhey, 2014). This is  
291 mediated by the electrostatic interaction with the acidic carboxy-terminal tails of alpha-  
292 and beta-tubulins. Therefore, it is conceivable that such an electrostatic interaction  
293 between K-loop and other acidic elements might sterically interfere with microtubule  
294 interaction. However, such an involvement of K-loop towards autoinhibitory regulation  
295 of kinesin-3 motors has so far not been described. Indeed, the autoinhibitory effects  
296 observed between the K-loop of KIF1A and DNA elements of 6HB-400nm scaffold are  
297 of non-physiological nature. However, a stretch of acidic amino acids is present in the  
298 coiled-coil regions of kinesin-3 motors that can mediate such an electrostatic interaction.  
299 Additionally, the MAP mediated regulation of kinesin-3 family motors might also  
300 involve such an electrostatic interaction (Monroy et al., 2020). Dimerization of kinesin-3  
301 motors has been proposed to be an important regulatory step for their motility (Soppina et  
302 al., 2014; Al-Bassam et al., 2003; Patel et al., 2021; Siddiqui and Straube, 2017;  
303 Hammond et al., 2009). Since multimerization of kinesin-3 monomers can also lead to  
304 intracellular cargo transport (Schimert et al., 2019), here we propose an additional tier of  
305 autoinhibitory regulation of kinesin-3 motors mediated by the K-loop. Autoinhibition of  
306 motors by the cargo domain is a common feature among kinesin family motors (Sweeney  
307 and Holzbaur, 2018). In this study using DNA origami and ensemble motors we have



308 illuminated an autoinhibition mechanism that was not described previously. Further  
309 underscoring the power of studying motors in ensembles and the importance of the 6HB-  
310 400nm DNA origami scaffold developed in this study.

311

## 312 **Materials and Methods**

### 313 **Protein Purification**

314 Truncated Rat KIF1A (1-393 amino acids, dimer) followed by a GCN4 leucine zipper  
315 and Rat KIF1A (1-369 amino acids, monomer) was cloned into a pET-17b vector with a  
316 SNAP-tag followed by a 10X Histidine-tag at the carboxy-terminus. All the KIF1A gene  
317 constructs were expressed using the BL21(DE3) bacterial expression system.

318 Transformed cells were grown at 37°C to 0.D 0.4-0.6 followed by induction with 0.5mM  
319 IPTG and overnight shaking at 18°C. Cells were harvested and lysed in Buffer-A  
320 containing 25mM pipes, pH 6.8, 100mM KCl, 5mM MgCl<sub>2</sub>, 5mM β-mercaptoethanol,  
321 30mM imidazole. The supernatant was loaded onto a Ni-NTA column, followed by a  
322 high salt wash (Buffer-A with 300mM KCl, 200μM ATP) followed by elution using  
323 Buffer-A with 350mM imidazole. Pure proteins were obtained by further subjecting the  
324 Ni-NTA elute to size exclusion chromatography using an S200 16/1600 column (GE)  
325 with Buffer-A.

326

### 327 **Preparation of Benzyl Guanine-labeled oligo**

328 Benzyl-guanine NHS ester (BG-GLA-NHS; NEB S2040) was covalently linked to the  
329 C7-amine modified oligonucleotide (Sigma), LPAH2 (see Supplementary Table 1).  
330 Briefly, 2mM LPAH2 (purchased from Sigma), was mixed with 20mM BG-NHS  
331 (dissolved in DMSO) in a molar ratio of 1:30 in the presence of 65mM HEPES pH 8.6  
332 and incubated at 37°C with constant stirring overnight. The mixture was subjected to  
333 speed vacuum to get rid of the DMSO and further reconstituted in water. BG-labelled  
334 oligo was separated from excess BG-NHS and unlabeled oligo by subjecting this mixture  
335 to reverse phase HPLC using C18 column. Briefly, 100uL of the oligonucleotide mixture  
336 was injected into a clarity 5u oligo RP column (Phenomenex 00B-4442-E0) and was  
337 subjected to an increasing gradient of acetonitrile starting from 5% to 35% in 0.5M  
338 TEAA in 30 minutes. The NH<sub>2</sub>-oligo and the BG-labeled oligo were separated during



339 this elution. Labeling was confirmed by mass spectrometric analysis. The BG-labeled  
340 oligonucleotide peak was collected, speed vacuumed, and further purified using obtained  
341 ethanol precipitation.

342

### 343 **Labelling Kinesin with Benzyl-Guanine oligonucleotide (BG-oligonucleotide)**

344 SNAP-tagged KIF1A proteins were incubated with a 2X molar excess of BG-labeled  
345 oligonucleotide at room temperature for 15 minutes followed by overnight incubation at  
346 4°C. The removal of excess BG- oligonucleotide from the reaction was achieved by  
347 subjecting the motor to Microtubule-binding and its release in the presence of ATP.  
348 Active BG-labeled oligonucleotide motors obtained were flash frozen as 5uL aliquots and  
349 stored at -80°C. In case of dimeric kinesin, excess BG-oligo removal was achieved by  
350 another round of Ni-NTA purification. Labeling efficiency was assessed by a 10% SDS-  
351 PAGE gel as labeled protein showed a distinct gel shift (Supplementary Figure 3).

352

### 353 **6HB-400nm DNA origami structure preparation**

354 The 6HB-400nm structure was modified from a previously published structure (Bui et al.,  
355 2010). The sequences of all staple strands, and anti-handle stands are given in the  
356 Supplementary Table 1. 10nM m13mp18 ssDNA (NEB S4040) were mixed with 100nM  
357 core staples and 500nM handle staples to a total volume of 50uL in 1X folding buffer  
358 (40mM Tris, 20mM acetic acid, 1mM EDTA, 12.5mM MgCl<sub>2</sub>, pH 8.0), followed by  
359 annealing in a PCR machine as follows: 90°C for 10 minutes, then cooled to 65°C with  
360 1°C per minute, then further cooled to 10°C with 1°C per minute. The folded 6HB were  
361 purified from excess staples using Amicon centriprep column.

362

### 363 **Motility and rigor assays**

364 Typically, a 5uL aliquot of 6HB-400nm (~2nM) was mixed with 2uL of BG-labeled  
365 oligonucleotide kinesin (~1uM) and incubated for 1 hour at RT and subsequently in ice  
366 for the duration of the assay. Successful formation of motor-6HB complex was assessed  
367 by 1% agarose gel where complexes showed graded retardation in mobility with  
368 increasing number of motors in the complex (Figure 1 and Supplementary Figure 3).  
369 Biotinylated-CY5-labelled Microtubules were attached onto an acid washed glass surface

370 using biotin-streptavidin chemistry. 0.9 $\mu$ L of motility mixture (motor-6HB-400nm  
371 complex in 1XBRB80 containing 1mg/mL Casein and 20 $\mu$ M Taxol, 2.5mM PCA, 50nM  
372 PCD, 50nM Trolox and 2mM ATP) was added to the motor-6HB-400nm complex and  
373 flowed onto the motility chamber containing microtubules. In the case of rigor  
374 experiments, ATP was omitted from the motility mixture. For rescue experiments,  
375 respective oligonucleotides as indicated was added to the motor:6HB-400nm mixture, for  
376 detailed information regarding the sequence of oligonucleotides see Supplementary  
377 Table1. Single-molecule motility of DNA-motor complex was imaged using a Nikon Ti-2  
378 microscope (1.49 N.A., 100x objective) using total internal reflection microscopy (TIRF);  
379 images were acquired with a Hamamatsu sCMOS camera and NIS Elements software at  
380 1-5Hz intervals. Velocities were calculated using kymograph analysis in ImageJ software  
381 and Fiesta software.

382

### 383 **References**

- 384 Al-Bassam, J., Y. Cui, D. Klopfenstein, B.O. Carragher, R.D. Vale, and R.A. Milligan.  
385 2003. Distinct conformations of the kinesin Unc104 neck regulate a monomer to  
386 dimer motor transition. *J. Cell Biol.* 163:743–753. doi:10.1083/jcb.200308020.
- 387 Bui, H., C. Onodera, C. Kidwell, Y. Tan, E. Graugnard, W. Kuang, J. Lee, W.B.  
388 Knowlton, B. Yurke, and W.L. Hughes. 2010. Programmable Periodicity of  
389 Quantum Dot Arrays with DNA Origami Nanotubes. *Nano Lett.* 10:3367–3372.  
390 doi:10.1021/nl101079u.
- 391 Derr, N.D., B.S. Goodman, R. Jungmann, A.E. Leschziner, W.M. Shih, and S.L. Reck-  
392 Peterson. 2012. Tug-of-war in motor protein ensembles revealed with a  
393 programmable DNA origami scaffold. *Science.* 338:662–665.  
394 doi:10.1126/science.1226734.
- 395 Driller-Colangelo, A.R., K.W.L. Chau, J.M. Morgan, and N.D. Derr. 2016. Cargo rigidity  
396 affects the sensitivity of dynein ensembles to individual motor pausing.  
397 *Cytoskelet. Hoboken NJ.* 73:693–702. doi:10.1002/cm.21339.
- 398 Furuta, K., A. Furuta, Y.Y. Toyoshima, M. Amino, K. Oiwa, and H. Kojima. 2013.  
399 Measuring collective transport by defined numbers of processive and  
400 nonprocessive kinesin motors. *Proc. Natl. Acad. Sci. U. S. A.* 110:501–506.  
401 doi:10.1073/pnas.1201390110.
- 402 Gennerich, A., and R.D. Vale. 2009. Walking the walk: how kinesin and dynein  
403 coordinate their steps. *Curr. Opin. Cell Biol.* 21:59–67.  
404 doi:10.1016/j.ceb.2008.12.002.

- 405 Hammond, J.W., T.L. Blasius, V. Soppina, D. Cai, and K.J. Verhey. 2010. Autoinhibition  
406 of the kinesin-2 motor KIF17 via dual intramolecular mechanisms. *J. Cell Biol.*  
407 189:1013–1025. doi:10.1083/jcb.201001057.
- 408 Hammond, J.W., D. Cai, T.L. Blasius, Z. Li, Y. Jiang, G.T. Jih, E. Meyhofer, and K.J.  
409 Verhey. 2009. Mammalian Kinesin-3 motors are dimeric in vivo and move by  
410 processive motility upon release of autoinhibition. *PLoS Biol.* 7:e72.  
411 doi:10.1371/journal.pbio.1000072.
- 412 Hariadi, R.F., R.F. Sommese, A.S. Adhikari, R.E. Taylor, S. Sutton, J.A. Spudich, and S.  
413 Sivaramakrishnan. 2015a. Mechanical coordination in motor ensembles revealed  
414 using engineered artificial myosin filaments. *Nat. Nanotechnol.* 10:696–700.  
415 doi:10.1038/nnano.2015.132.
- 416 Hariadi, R.F., R.F. Sommese, and S. Sivaramakrishnan. 2015b. Tuning myosin-driven  
417 sorting on cellular actin networks. *eLife.* 4. doi:10.7554/eLife.05472.
- 418 Hirokawa, N., R. Nitta, and Y. Okada. 2009a. The mechanisms of kinesin motor motility:  
419 lessons from the monomeric motor KIF1A. *Nat. Rev. Mol. Cell Biol.* 10:877–884.  
420 doi:10.1038/nrm2807.
- 421 Hirokawa, N., Y. Noda, Y. Tanaka, and S. Niwa. 2009b. Kinesin superfamily motor  
422 proteins and intracellular transport. *Nat. Rev. Mol. Cell Biol.* 10:682–696.  
423 doi:10.1038/nrm2774.
- 424 Huo, L., Y. Yue, J. Ren, J. Yu, J. Liu, Y. Yu, F. Ye, T. Xu, M. Zhang, and W. Feng.  
425 2012. The CC1-FHA tandem as a central hub for controlling the dimerization and  
426 activation of kinesin-3 KIF1A. *Struct. Lond. Engl.* 1993. 20:1550–1561.  
427 doi:10.1016/j.str.2012.07.002.
- 428 Imanishi, M., N.F. Endres, A. Gennerich, and R.D. Vale. 2006. Autoinhibition regulates  
429 the motility of the *C. elegans* intraflagellar transport motor OSM-3. *J. Cell Biol.*  
430 174:931–937. doi:10.1083/jcb.200605179.
- 431 Lessard, D.V., O.J. Zinder, T. Hotta, K.J. Verhey, R. Ohi, and C.L. Berger. 2019.  
432 Polyglutamylation of tubulin’s C-terminal tail controls pausing and motility of  
433 kinesin-3 family member KIF1A. *J. Biol. Chem.* 294:6353–6363.  
434 doi:10.1074/jbc.RA118.005765.
- 435 McKenney, R.J., W. Huynh, R.D. Vale, and M. Sirajuddin. 2016. Tyrosination of  $\alpha$ -  
436 tubulin controls the initiation of processive dynein-dynactin motility. *EMBO J.*  
437 35:1175–1185. doi:10.15252/embj.201593071.
- 438 Monroy, B.Y., T.C. Tan, J.M. Oclaman, J.S. Han, S. Simó, S. Niwa, D.W. Nowakowski,  
439 R.J. McKenney, and K.M. Ori-McKenney. 2020. A Combinatorial MAP Code  
440 Dictates Polarized Microtubule Transport. *Dev. Cell.* 53:60-72.e4.  
441 doi:10.1016/j.devcel.2020.01.029.

- 442 Okada, Y., and N. Hirokawa. 1999. A processive single-headed motor: kinesin  
443 superfamily protein KIF1A. *Science*. 283:1152–1157.  
444 doi:10.1126/science.283.5405.1152.
- 445 Patel, N.M., M.S.A. Siva, R. Kumari, D.J. Shewale, A. Rai, M. Ritt, P. Sharma, S.R.G.  
446 Setty, S. Sivaramakrishnan, and V. Soppina. 2021. KIF13A motors are regulated  
447 by Rab22A to function as weak dimers inside the cell. *Sci. Adv.* 7:eabd2054.  
448 doi:10.1126/sciadv.abd2054.
- 449 Prevo, B., J.M. Scholey, and E.J.G. Peterman. 2017. Intraflagellar transport: mechanisms  
450 of motor action, cooperation, and cargo delivery. *FEBS J.* 284:2905–2931.  
451 doi:10.1111/febs.14068.
- 452 Rai, A., D. Pathak, S. Thakur, S. Singh, A.K. Dubey, and R. Mallik. 2016. Dynein  
453 Clusters into Lipid Microdomains on Phagosomes to Drive Rapid Transport  
454 toward Lysosomes. *Cell*. 164:722–734. doi:10.1016/j.cell.2015.12.054.
- 455 Ren, J., S. Wang, H. Chen, W. Wang, L. Huo, and W. Feng. 2018. Coiled-coil 1-  
456 mediated fastening of the neck and motor domains for kinesin-3 autoinhibition.  
457 *Proc. Natl. Acad. Sci. U. S. A.* 115:E11933–E11942.  
458 doi:10.1073/pnas.1811209115.
- 459 Scarabelli, G., V. Soppina, X.-Q. Yao, J. Atherton, C.A. Moores, K.J. Verhey, and B.J.  
460 Grant. 2015. Mapping the Processivity Determinants of the Kinesin-3 Motor  
461 Domain. *Biophys. J.* 109:1537–1540. doi:10.1016/j.bpj.2015.08.027.
- 462 Schimert, K.I., B.G. Budaitis, D.N. Reinemann, M.J. Lang, and K.J. Verhey. 2019.  
463 Intracellular cargo transport by single-headed kinesin motors. *Proc. Natl. Acad.*  
464 *Sci. U. S. A.* 116:6152–6161. doi:10.1073/pnas.1817924116.
- 465 Siddiqui, N., and A. Straube. 2017. Intracellular cargo transport by kinesin-3 motors.  
466 *Biochem. Mosc.* 82:803–815. doi:10.1134/S0006297917070057.
- 467 Sirajuddin, M., L.M. Rice, and R.D. Vale. 2014. Regulation of microtubule motors by  
468 tubulin isoforms and post-translational modifications. *Nat. Cell Biol.* 16:335–344.  
469 doi:10.1038/ncb2920.
- 470 Soppina, V., S.R. Norris, A.S. Dizaji, M. Kortus, S. Veatch, M. Peckham, and K.J.  
471 Verhey. 2014. Dimerization of mammalian kinesin-3 motors results in  
472 superprocessive motion. *Proc. Natl. Acad. Sci. U. S. A.* 111:5562–5567.  
473 doi:10.1073/pnas.1400759111.
- 474 Soppina, V., and K.J. Verhey. 2014. The family-specific K-loop influences the  
475 microtubule on-rate but not the superprocessivity of kinesin-3 motors. *Mol. Biol.*  
476 *Cell.* 25:2161–2170. doi:10.1091/mbc.E14-01-0696.

- 477 Spudich, J.A. 2014. Hypertrophic and dilated cardiomyopathy: four decades of basic  
478 research on muscle lead to potential therapeutic approaches to these devastating  
479 genetic diseases. *Biophys. J.* 106:1236–1249. doi:10.1016/j.bpj.2014.02.011.
- 480 Sweeney, H.L., and E.L.F. Holzbaur. 2018. Motor Proteins. *Cold Spring Harb. Perspect.*  
481 *Biol.* 10:a021931. doi:10.1101/cshperspect.a021931.
- 482 Tomishige, M., D.R. Klopfenstein, and R.D. Vale. 2002. Conversion of Unc104/KIF1A  
483 kinesin into a processive motor after dimerization. *Science.* 297:2263–2267.  
484 doi:10.1126/science.1073386.
- 485 Toropova, K., M. Mladenov, and A.J. Roberts. 2017. Intraflagellar transport dynein is  
486 autoinhibited by trapping of its mechanical and track-binding elements. *Nat.*  
487 *Struct. Mol. Biol.* 24:461–468. doi:10.1038/nsmb.3391.
- 488

489 **Figure Legends**

490 **Figure 1: Characterization of 400nm-6HB DNA origami as motor cargo scaffold. A.**

491 Cartoon representation of 6HB-400nm DNA origami scaffold used in this study as  
492 illustrated. 28 handle sites are located in the helix 2 as a single file and three fluorescent  
493 handles are located each in helix 1 and 5. **B.** Negative stained electron micrograph of  
494 6HB-400nm DNA origami scaffold. Scale bar = 50nm. **C.** Agarose gel shift assays for  
495 6HB-400nm scaffold with and without KIF1A dimers for varying handle sites as marked.  
496 **D.** Representative kymographs of KIF1A 1-393 SNAP-647 (grey) and 6HB-400nm 28H  
497 KIF1A 1-393 SNAP ensemble motors (blue) moving on microtubules. Scale bar = 5 $\mu$ m  
498 and 10 seconds. **E.** Velocity and processivity histograms of KIF1A 1-393 SNAP-647 (in  
499 grey) and 6HB-400nm 16H KIF1A 1-393 SNAP ensemble (in blue) motors. The average  
500 velocity of KIF1A 1-393 SNAP-647 are  $1.27 \pm 0.39 \mu\text{m s}^{-1}$ , n=100 6HB-400nm 16H  
501 KIF1A 1-393 SNAP ensembles are  $1.08 \pm 0.29 \mu\text{m s}^{-1}$ , n=91. The average run length of  
502 KIF1A 1-393 SNAP-647 are 3.36 $\mu$ m and 6HB-400nm 16H KIF1A 1-393 SNAP  
503 ensembles are 9.8 $\mu$ m. n represents the number of motor particles analyzed.

504

505 **Figure 2: KIF1A dimer versus monomer ensemble motility. A.** Average velocity data  
506 of 6HB-400nm 4-28H KIF1A monomer ensembles with flexible and rigid  
507 oligonucleotides and KIF1A dimer ensembles with rigid oligonucleotides. **B.** Average  
508 processivity values of 6HB-400nm 4-28H KIF1A ensembles as described in A. Error bars  
509 represent the standard error of the mean from three independent experiments. For  
510 individual values see Supplementary Table 2.

511

512 **Figure 3: Microtubule-binding of KIF1A ensembles with varying linkers.**

513 Microtubule-binding of 6HB-400nm 8H KIF1A monomer ensembles with varying  
514 linkers as indicated and illustrated. The microtubules are shown in magenta and the 6HB-  
515 400nm KIF1A 8H in cyan. In each microtubule-binding experiment, a rescue reaction  
516 was performed (marked as rescue), where an oligonucleotide that is complementary to the  
517 flexible parts of linkers was added to the mixture. For more details regarding the  
518 sequences of linkers and rescue oligonucleotides see Supplementary Table 1. Scale bar =  
519 5 $\mu$ m.

520

521 **Figure 4: Motility properties of KIF1A ensembles with varying linkers. A.**

522 Representative kymographs of 6HB-400nm 4-28H KIF1A monomer ensembles with

523 flexible and flexible-rescue oligonucleotides. Scale bar = 5 $\mu$ m and 10 seconds. **B.**

524 Average landing frequency rates for 6HB-400nm 4H, 8H and 16H KIF1A monomer

525 ensembles with flexible linkers and rescue oligonucleotides as indicated. Error bars

526 represent the standard error of the mean from three independent experiments.

527

528 **Supplementary Figure 1: Illustration of DNA scaffold with protein attachment and**

529 **fluorescent handle sites. A.** Arrangement of m13mp18 single-stranded DNA as 6HB-

530 400nm DNA origami scaffold. The helices and corresponding base number are as

531 indicated. **B & C.** Zoomed in view of two distal end of 6HB-400nm DNA origami

532 scaffold as color coded in A. The m13mp18 strand and the complementary staple oligos

533 are marked as wavy lines in light and dark grey respectively. The fluorescent handle

534 extensions are indicated as red arrows. The helices, column number and handle numbers

535 (H1, H2, H3...H26, H27 & H28) and nucleotide base resolution are as indicated.

536

537 **Supplementary Figure 2: Folding and validation of 400nm-6HB handle occupancy.**

538 **A.** Agarose gel of m13mp18 scaffold (pre-folding lane), folded reaction of 400nm-6HB

539 (post-folding lane) and 6HB-400nm after removing the excess oligonucleotides (post-

540 purification lane). The is marked as 6hb and the size of ladder as indicated. **B.** Agarose

541 gel of 6HB-400nm with varying handle numbers incubated Cy3-labelled anti-handle

542 oligonucleotides as indicated, and the same gel was imaged under Cy3 and SYBR (UV)

543 channel. **C.** Agarose gel of 6HB-400nm with varying handle numbers incubated Cy3-

544 labelled anti-handle oligonucleotides as indicated. To rule out effects of the SYBR green,

545 the experiments were performed without SYBR. The same gel was imaged under Cy3

546 and SYBR (UV) channel. **D.** Mean fold increase in Cy3 fluorescence as a function of

547 handle number present in the 6HB-400nm DNA origami scaffold. Error bars represent

548 the standard error of the mean from three independent experiments.

549



550 **Supplementary Figure 3: Engineering kinesins for DNA attachment. A.** Cartoon  
551 representation of KIF1A motors tagged with oligonucleotides using benzyl-guanine and  
552 SNAP tag method. **B.** SDS-PAGE gel of KIF1A monomer and dimer before and after  
553 tagged with flexible and rigid anti-handle oligonucleotides as indicated. The white, red  
554 and yellow asterisks denote KIF1A unconjugated, KIF1A conjugated with rigid and  
555 flexible oligonucleotides respectively. **C.** Illustration of 6HB-400nm DNA origami  
556 scaffold with flexible, rigid and intermediate motor linkers as indicated. For details  
557 regarding the sequences of oligonucleotides see Supplementary Table 1. **D.** Agarose gel  
558 shift assays for 6HB-400nm scaffold with and without KIF1A monomer ensembles for  
559 the 8H used in Figure 3 rigor experiments. **E. & F.** Agarose gel shift assays for 6HB-  
560 400nm scaffold with and without KIF1A monomers with varying handle sites for flexible  
561 and rigid linkers as marked.

562

563 **Supplementary Figure 4: Kymographs of KIF1A ensemble motility.** Representative  
564 kymographs of KIF1A ensembles with flexible and rigid anti-handle oligonucleotides, for  
565 the data shown in Figure 2 as indicated. Scale bar = 5 $\mu$ m and 10 seconds.

566

567 **Supplementary Figure 5: Velocity and run length histograms of KIF1A ensemble**  
568 **motility.** Velocity and processivity histograms of 6HB-400nm 4-28H KIF1A monomer  
569 and dimer ensembles. Data for KIF1A monomer ensembles with flexible, rigid and  
570 KIF1A dimer ensembles with rigid anti-handle oligonucleotides are shown as indicated.

571

572 **Supplementary Figure 6: Microtubule binding of KIF1A 16H ensembles.**

573 Microtubule-binding of 6HB-400nm 16H KIF1A monomer ensembles with varying  
574 linkers as indicated and illustrated. The microtubules are shown in magenta and the 6HB-  
575 400nm KIF1A ensembles in cyan. In each microtubule-binding experiment, a rescue  
576 reaction was perfumed (marked as rescue), where an oligonucleotide that is  
577 complimentary to the flexible parts of linkers was added to the mixture. For more details  
578 regarding the sequences of linkers and rescue oligonucleotides see Supplementary Table  
579 1. Scale bar = 5 $\mu$ m.

580

581 **Supplementary Figure 7: Histograms and kymographs of KIF1A ensembles with**  
582 **flexible and rescue linkers. A.** Velocity and processivity histograms of 6HB-400nm 4-  
583 28H KIF1A monomer ensembles with flexible and flexible-rescue oligonucleotides, for  
584 the data shown in Figure 4.

585

586 **Supplementary Movie 1:** KIF1A 8H ensembles with rigid, flexible and flexible with  
587 rescue oligonucleotides as indicated. Scale bar = 5 $\mu$ m and time in minutes/seconds  
588 (mm:ss format) as indicated.

589

590

591

592 **Acknowledgments**

593 We thank the Sirajuddin lab members for critical feedback on the manuscript. P.L  
594 acknowledges the support from inStem Graduate Program. M.S acknowledges funding  
595 support from inStem core grants from the Department of Biotechnology, India, a  
596 DBT/Wellcome Trust India Alliance Intermediate Fellowship (IA/I/14/2/501533), EMBO  
597 Young Investigator Programme award, CEFIPRA (5703-1), the Department of Science  
598 and Technology, SERB-EMR grant (CRG/2019/003246) and DBT-BIRAC  
599 (BT/PR40389/COT/142/6/2020).

600 **Author Contribution**

601 P.L and M.S designed the work. P.L performed the experiments and analyzed the data.  
602 M.S supervised the work and wrote the paper.

603

604 **Competing interests**

605 The authors declare no conflict of interest.

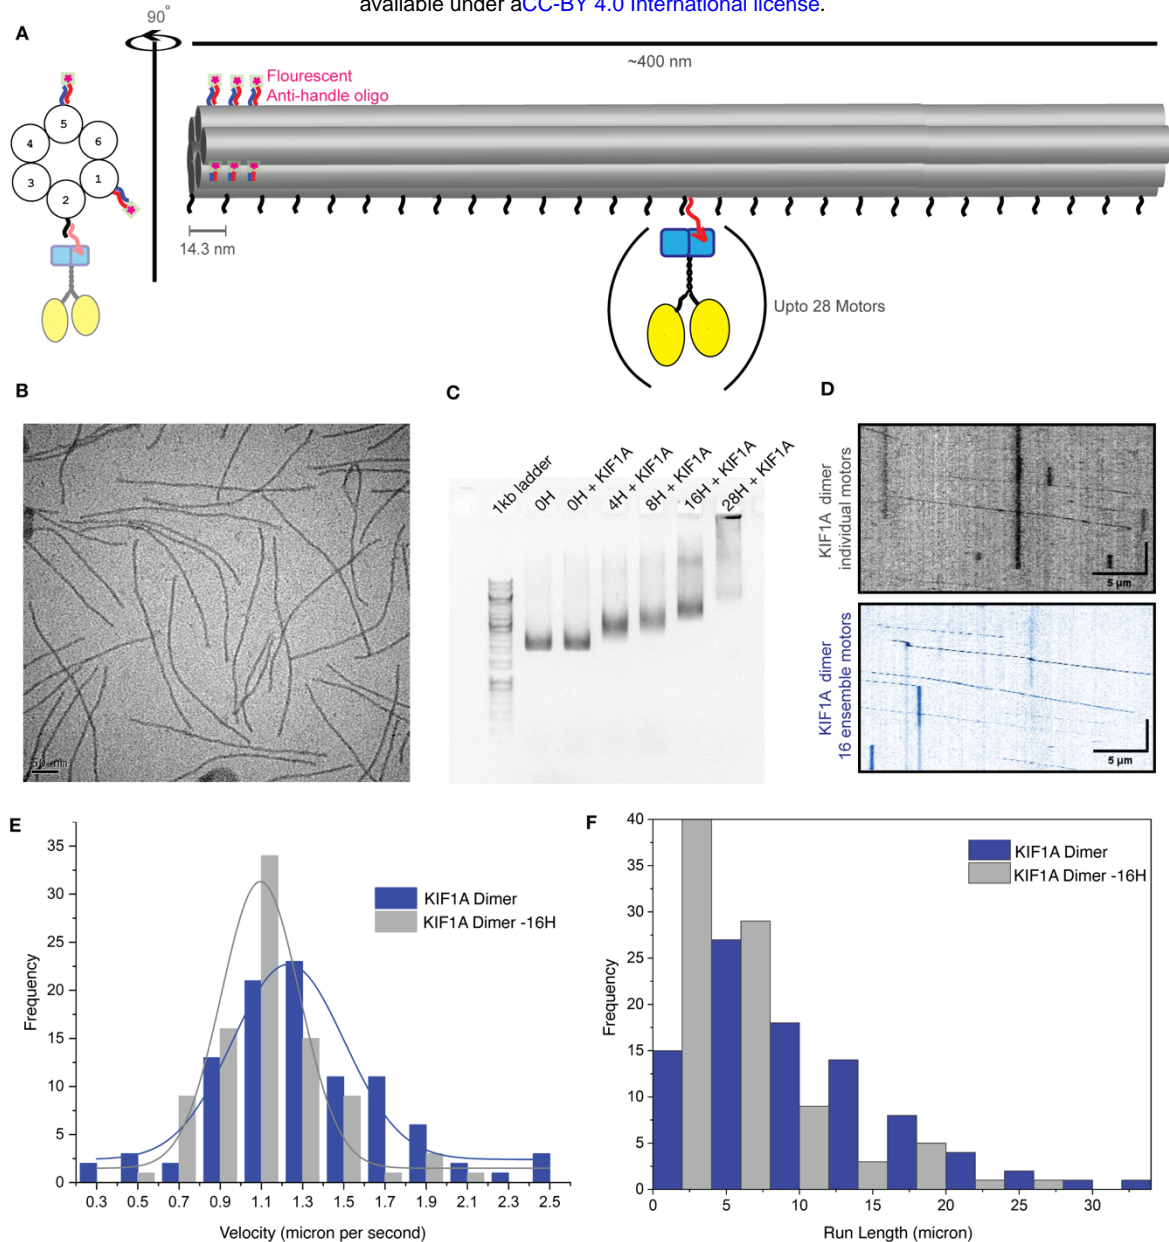

**Figure 1: Characterization of 400nm-6HB DNA origami as motor cargo scaffold.**

**A.** Cartoon representation of 6HB-400nm DNA origami scaffold used in this study as illustrated. 28 handle sites are located in the helix 2 as a single file and three fluorescent handles are located each in helix 1 and 5. **B.** Negative stained electron micrograph of 6HB-400nm DNA origami scaffold. Scale bar = 50nm. **C.** Agarose gel shift assays for 6HB-400nm scaffold with and without KIF1A dimers for varying handle sites as marked. **D.** Representative kymographs of KIF1A 1-393 SNAP-647 (grey) and 6HB-400nm 28H KIF1A 1-393 SNAP ensemble motors (blue) moving on microtubules. Scale bar = 5μm and 10 seconds. **E.** Velocity and processivity histograms of KIF1A 1-393 SNAP-647 (in grey) and 6HB-400nm 16H KIF1A 1-393 SNAP ensemble (in blue) motors. The average velocity of KIF1A 1-393 SNAP-647 are  $1.27 \pm 0.39 \mu\text{m s}^{-1}$ ,  $n=100$  6HB-400nm 16H KIF1A 1-393 SNAP ensembles are  $1.08 \pm 0.29 \mu\text{m s}^{-1}$ ,  $n=91$ . The average run length of KIF1A 1-393 SNAP-647 are  $3.36 \mu\text{m}$  and 6HB-400nm 16H KIF1A 1-393 SNAP ensembles are  $9.8 \mu\text{m}$ .  $n$  represents the number of motor particles analyzed.

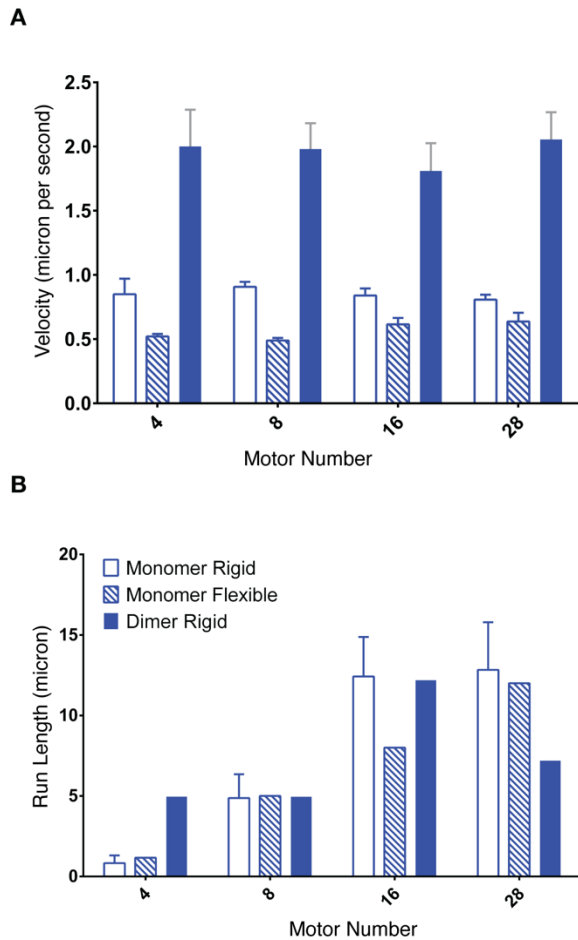

**Figure 2: KIF1A dimer versus monomer ensemble motility. A.** Average velocity data of 6HB-400nm 4-28H KIF1A monomer ensembles with flexible and rigid oligonucleotides and KIF1A dimer ensembles with rigid oligonucleotides. **B.** Average processivity values of 6HB-400nm 4-28H KIF1A ensembles as described in A. Error bars represent the standard error of the mean from three independent experiments. For individual values see Supplementary Table 2.



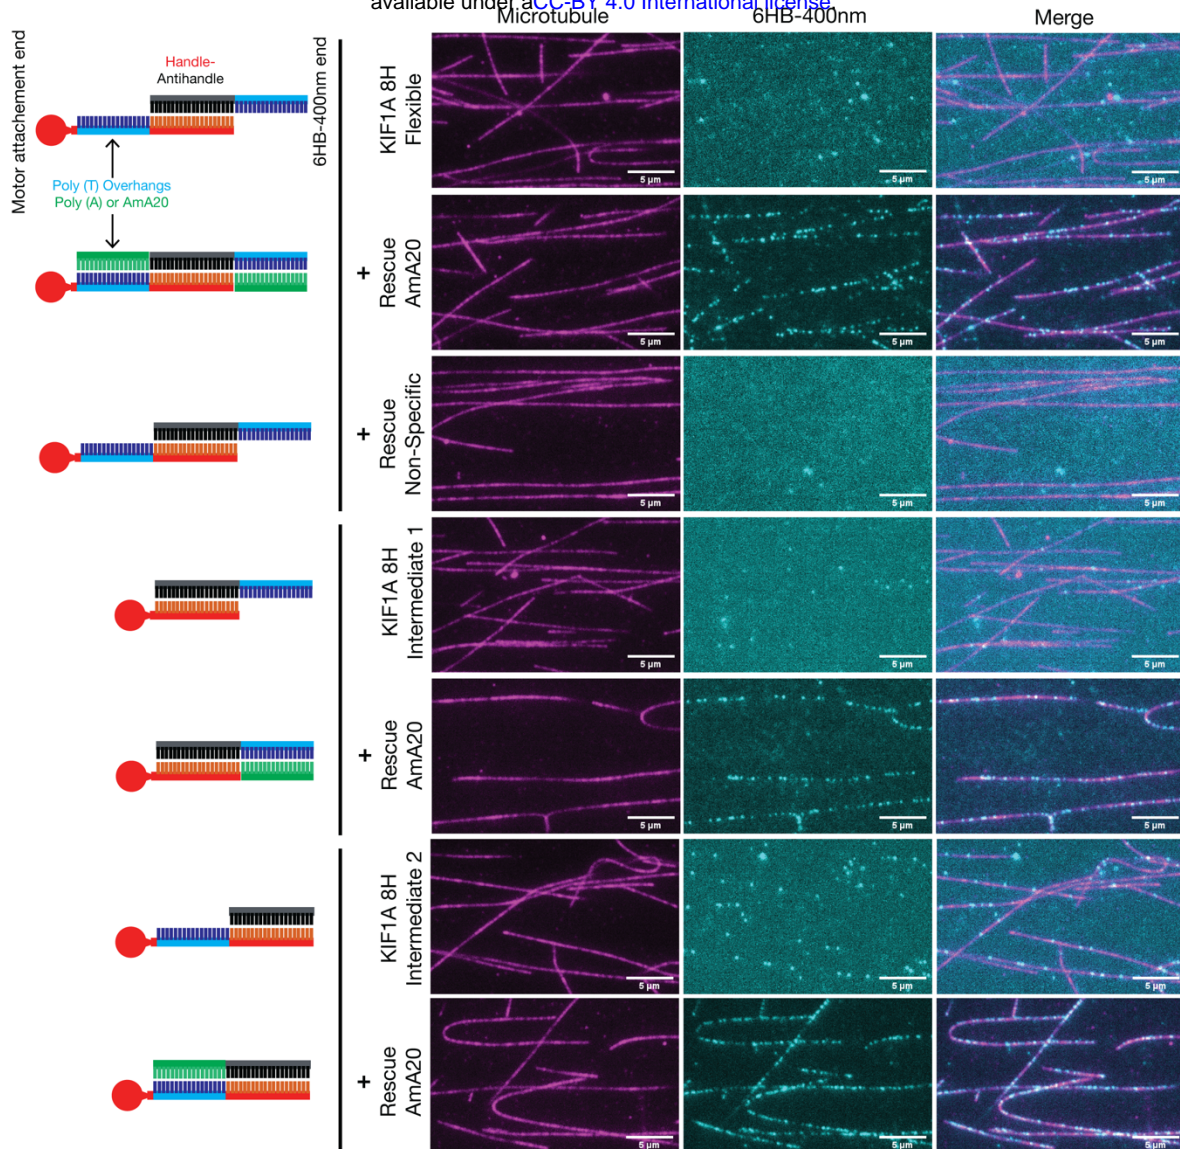

**Figure 3: Microtubule-binding of KIF1A ensembles with varying linkers.** Microtubule-binding of 6HB-400nm 8H KIF1A monomer ensembles with varying linkers as indicated and illustrated. The microtubules are shown in magenta and the 6HB-400nm KIF1A 8H in cyan. In each microtubule-binding experiment, a rescue reaction was performed (marked as rescue), where an oligonucleotide that is complementary to the flexible parts of linkers was added to the mixture. For more details regarding the sequences of linkers and rescue oligonucleotides see Supplementary Table 1. Scale bar = 5 $\mu$ m.

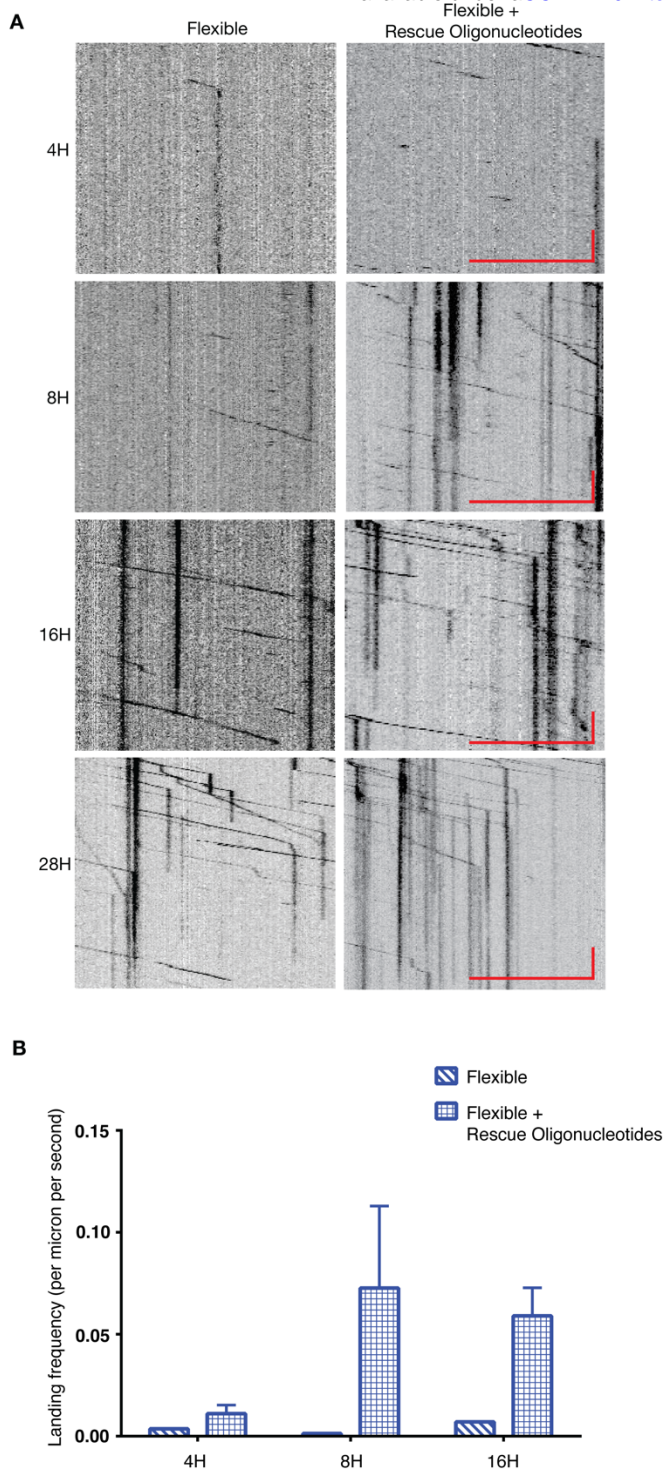

**Figure 4: Motility properties of KIF1A ensembles with varying linkers. A.** Representative kymographs of 6HB-400nm 4-28H KIF1A monomer ensembles with flexible and flexible-rescue oligonucleotides. Scale bar = 5 $\mu$ m and 10 seconds. **B.** Average landing frequency rates for 6HB-400nm 4H, 8H and 16H KIF1A monomer ensembles with flexible linkers and rescue oligonucleotides as indicated. Error bars represent the standard error of the mean from three independent experiments.



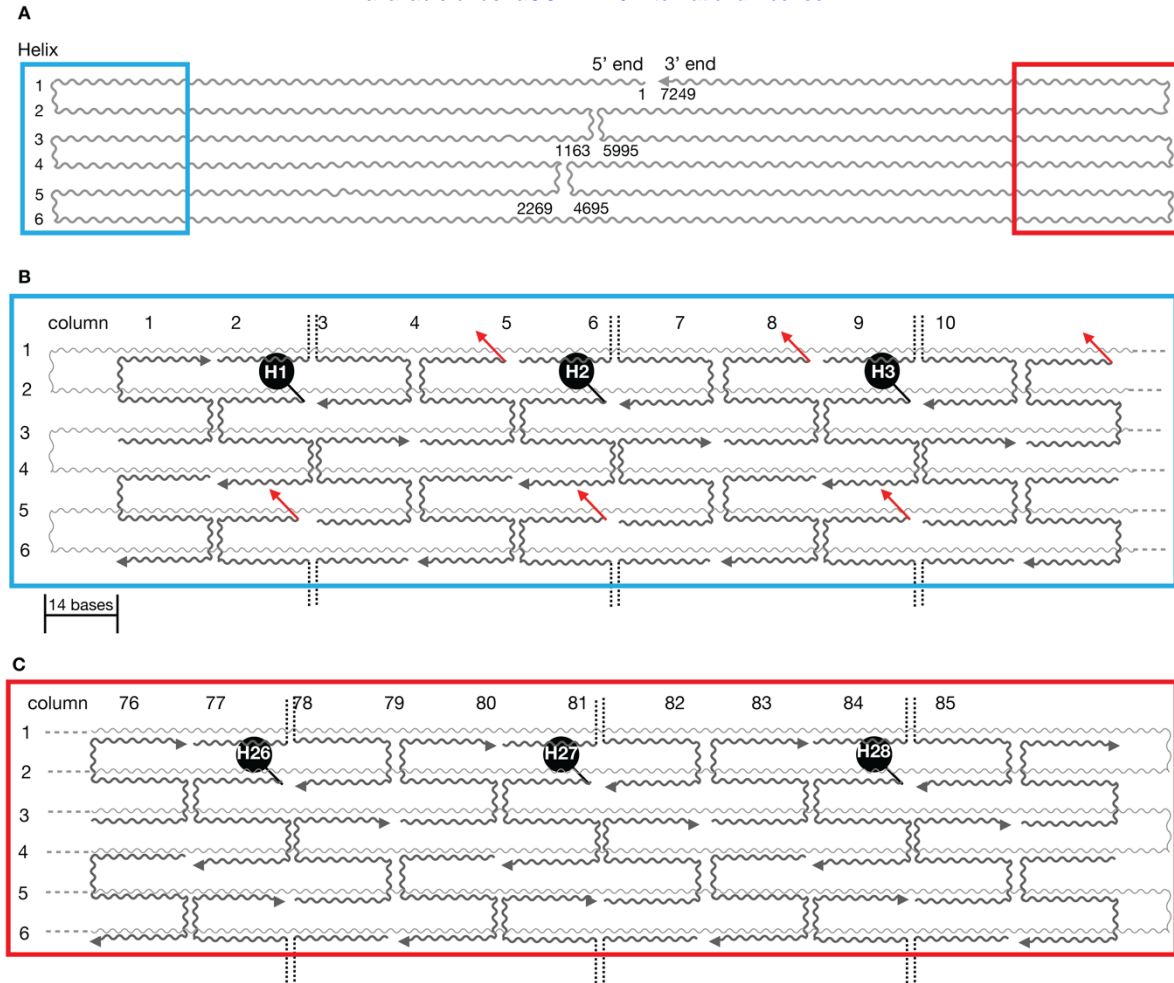

**Supplementary Figure 1: Illustration of DNA scaffold with protein attachment and fluorescent handle sites.** **A.** Arrangement of m13mp18 single-stranded DNA as 6HB-400nm DNA origami scaffold. The helices and corresponding base number are as indicated. **B & C.** Zoomed in view of two distal end of 6HB-400nm DNA origami scaffold as color coded in A. The m13mp18 strand and the complementary staple oligos are marked as wavy lines in light and dark grey respectively. The fluorescent handle extensions are indicated as red arrows. The helices, column number and handle numbers (H1, H2, H3...H26, H27 & H28) and nucleotide base resolution are as indicated.

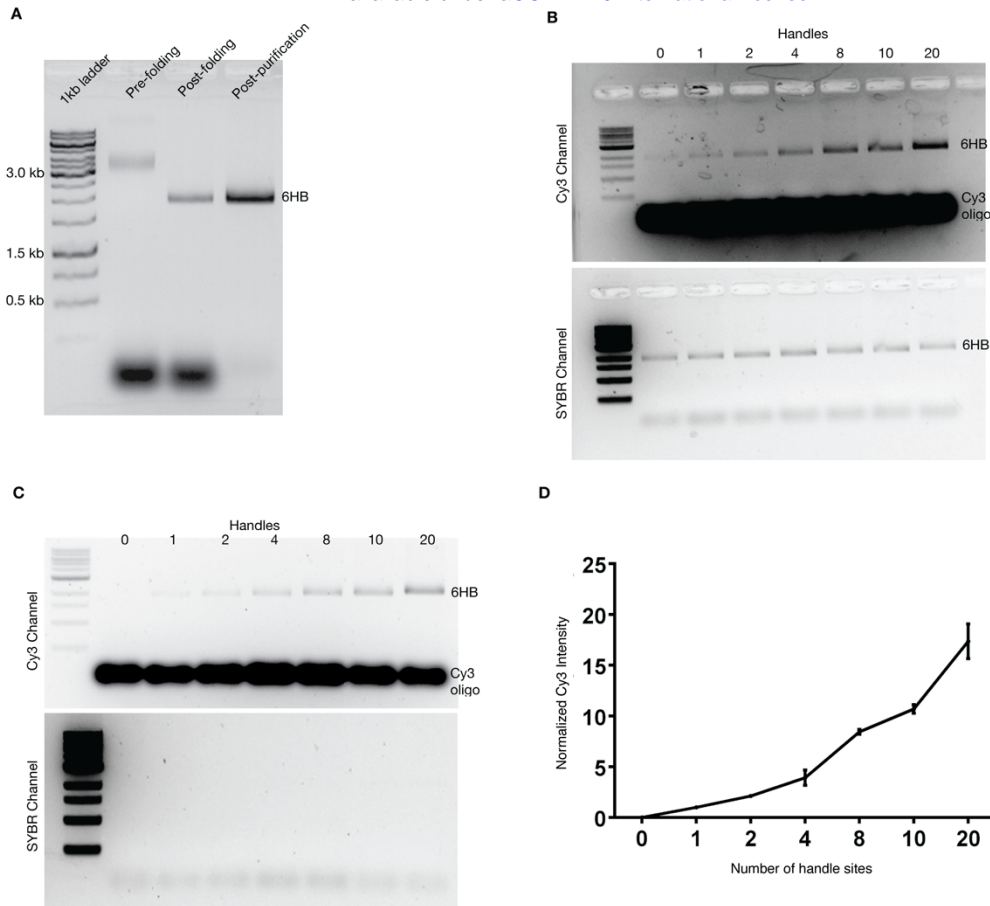

**Supplementary Figure 2: Folding and validation of 400nm-6HB handle occupancy.** **A.** Agarose gel of m13mp18 scaffold (pre-folding lane), folded reaction of 400nm-6HB (post-folding lane) and 6HB-400nm after removing the excess oligonucleotides (post-purification lane). The is marked as 6hb and the size of ladder as indicated. **B.** Agarose gel of 6HB-400nm with varying handle numbers incubated Cy3-labelled anti-handle oligonucleotides as indicated, and the same gel was imaged under Cy3 and SYBR (UV) channel. **C.** Agarose gel of 6HB-400nm with varying handle numbers incubated Cy3-labelled anti-handle oligonucleotides as indicated. To rule out effects of the SYBR green, the experiments were performed without SYBR. The same gel was imaged under Cy3 and SYBR (UV) channel. **D.** Mean fold increase in Cy3 fluorescence as a function of handle number present in the 6HB-400nm DNA origami scaffold. Error bars represent the standard error of the mean from three independent experiments.

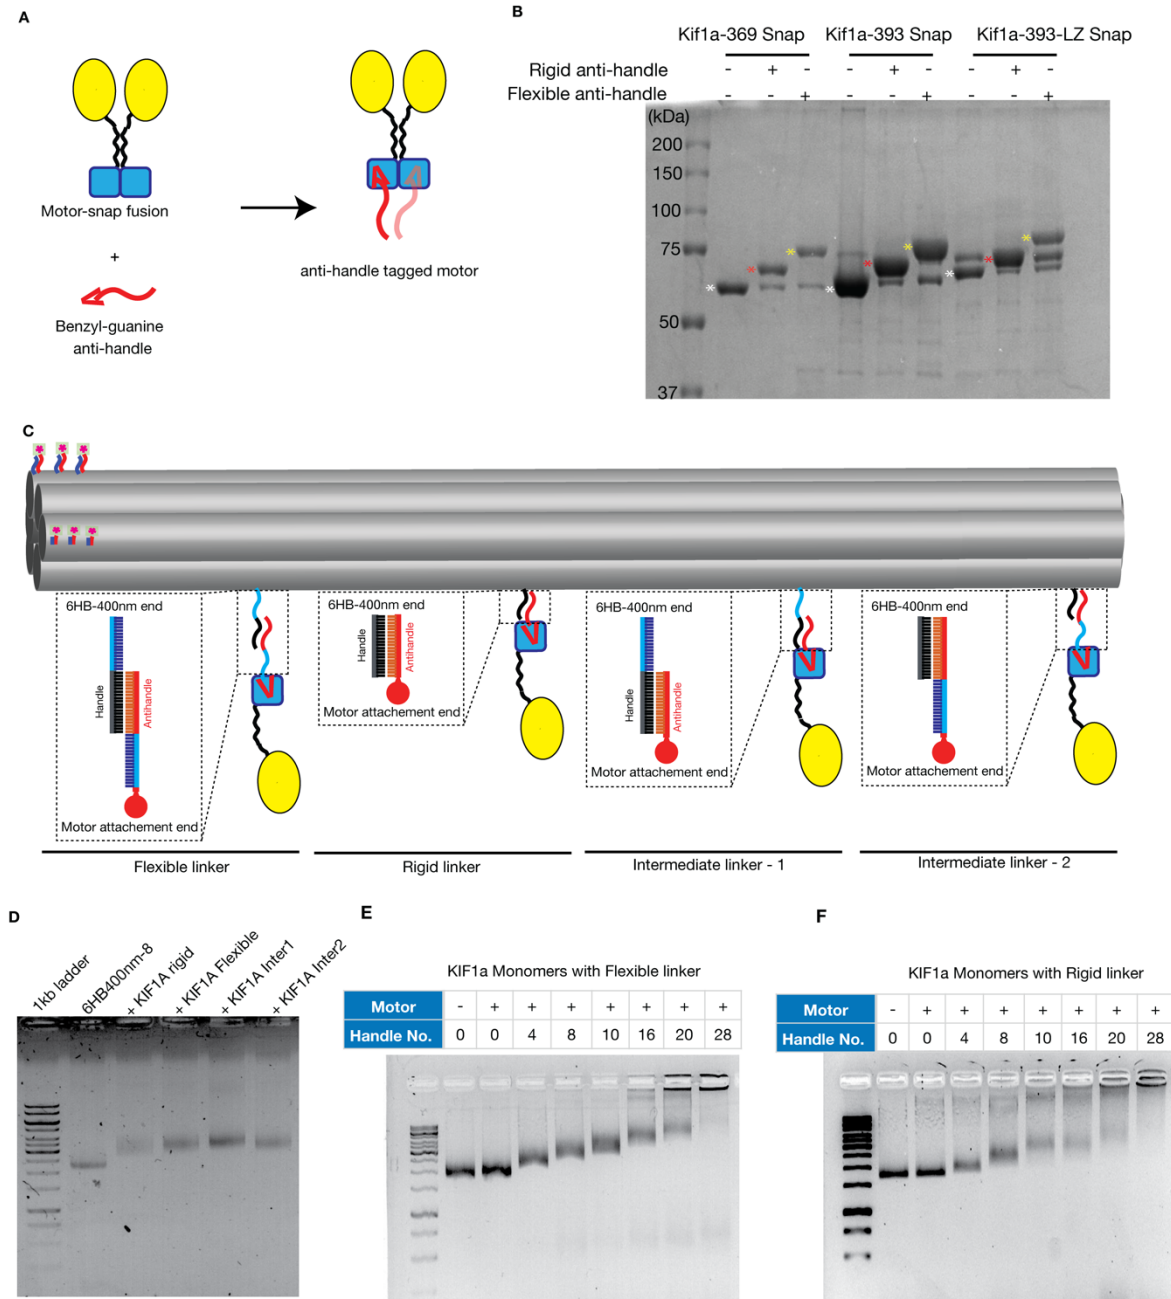

**Supplementary Figure 3: Engineering kinesins for DNA attachment.** **A.** Cartoon representation of KIF1A motors tagged with oligonucleotides using benzyl-guanine and SNAP tag method. **B.** SDS-PAGE gel of KIF1A monomer and dimer before and after tagged with flexible and rigid anti-handle oligonucleotides as indicated. The white, red and yellow asterisks denote KIF1A unconjugated, KIF1A conjugated with rigid and flexible oligonucleotides respectively. **C.** Illustration of 6HB-400nm DNA origami scaffold with flexible, rigid and intermediate motor linkers as indicated. For details regarding the sequences of oligonucleotides see Supplementary Table 1. **D.** Agarose gel shift assays for 6HB-400nm scaffold with and without KIF1A monomer ensembles for the 8H used in Figure 3 rigor experiments. **E. & F.** Agarose gel shift assays for 6HB-400nm scaffold with and without KIF1A monomers with varying handle sites for flexible and rigid linkers as marked.

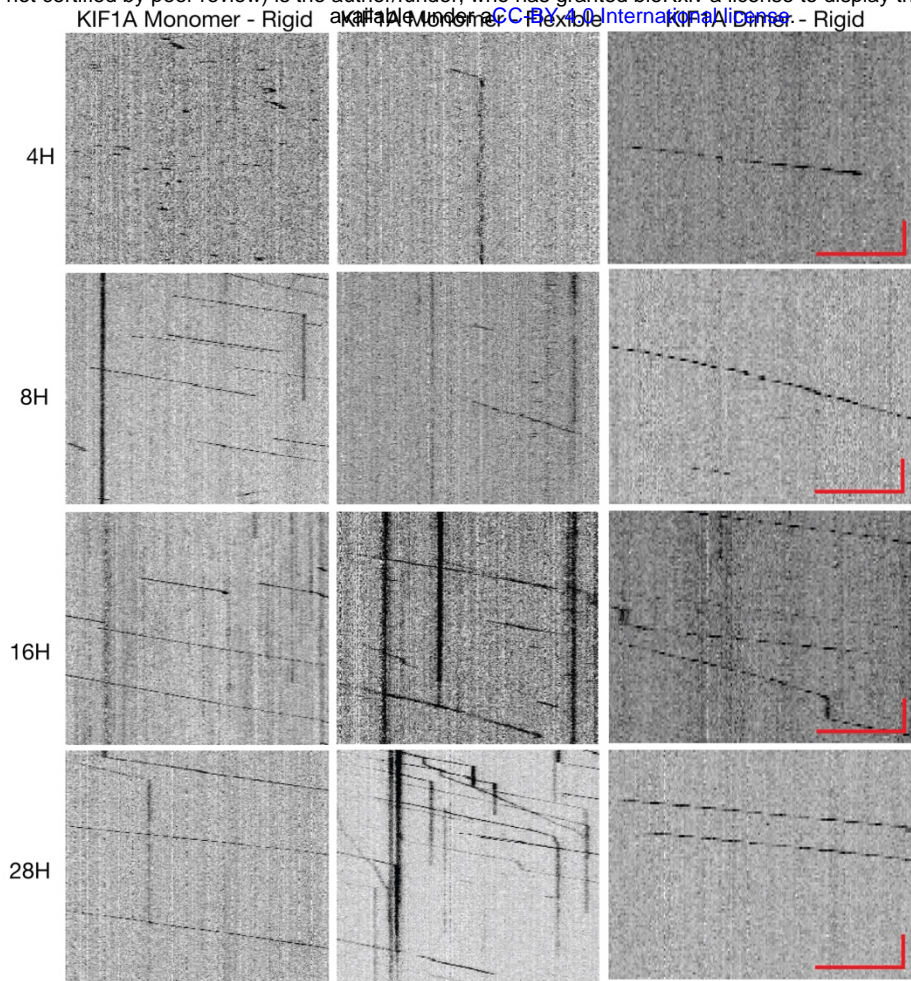

**Supplementary Figure 4: Kymographs of KIF1A ensemble motility.** Representative kymographs of KIF1A ensembles with flexible and rigid anti-handle oligonucleotides, for the data shown in Figure 2 as indicated. Scale bar = 5 $\mu$ m and 10 seconds.



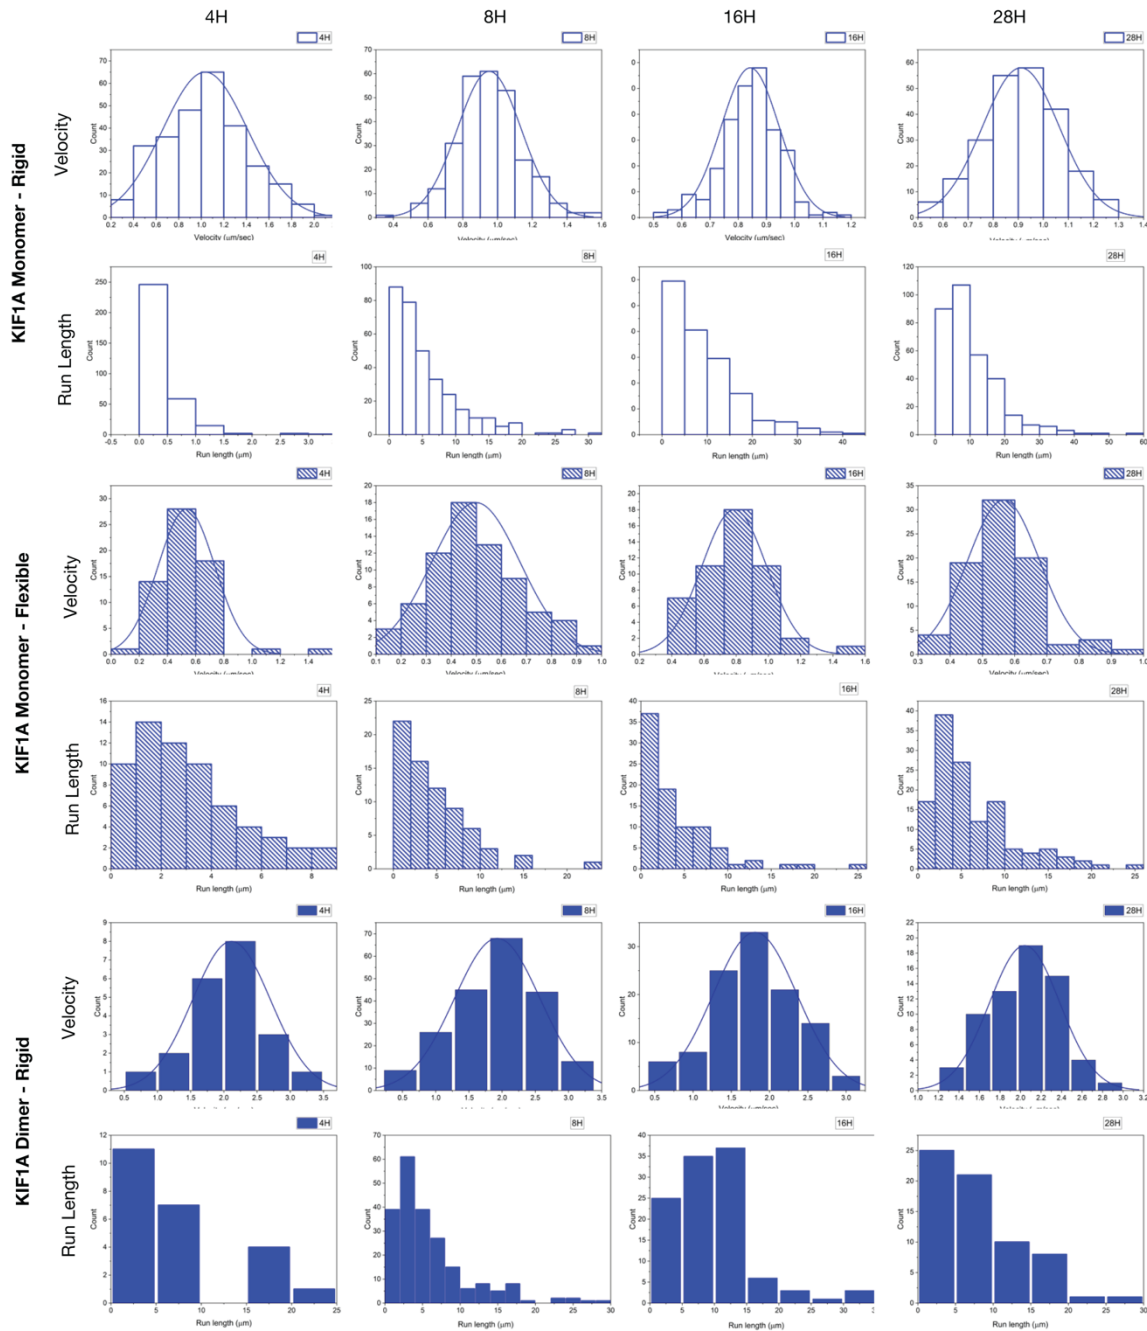

**Supplementary Figure 5: Velocity and run length histograms of KIF1A ensemble motility.** Velocity and processivity histograms of 6HB-400nm 4-28H KIF1A monomer and dimer ensembles. Data for KIF1A monomer ensembles with flexible, rigid and KIF1A dimer ensembles with rigid anti-handle oligonucleotides are shown as indicated.

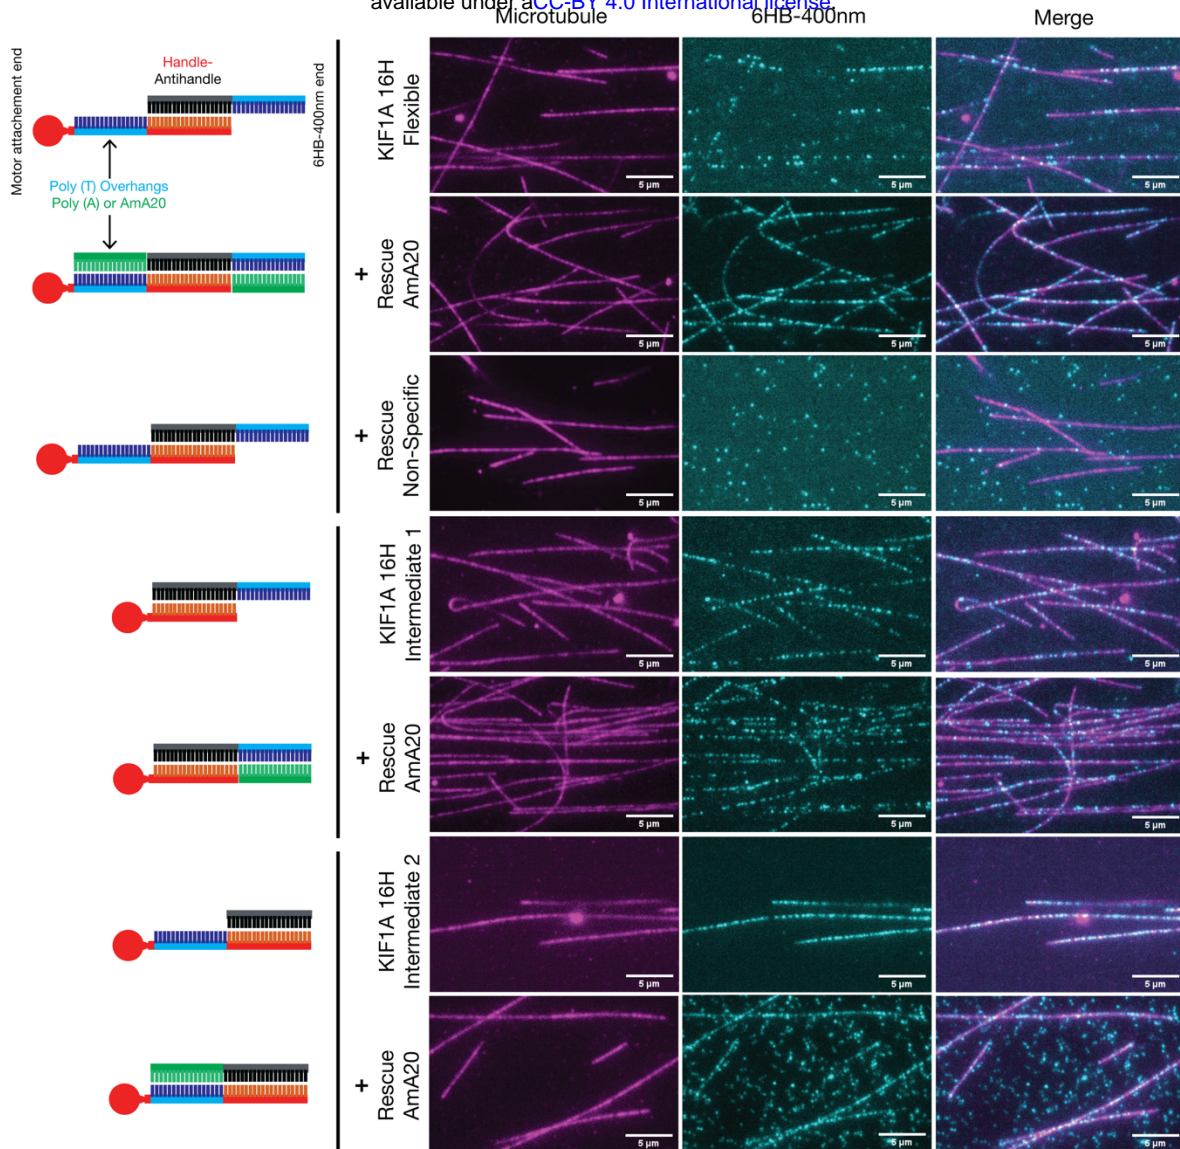

### Supplementary Figure 6: Microtubule binding of KIF1A 16H ensembles.

Microtubule-binding of 6HB-400nm 16H KIF1A monomer ensembles with varying linkers as indicated and illustrated. The microtubules are shown in magenta and the 6HB-400nm KIF1A ensembles in cyan. In each microtubule-binding experiment, a rescue reaction was performed (marked as rescue), where an oligonucleotide that is complementary to the flexible parts of linkers was added to the mixture. For more details regarding the sequences of linkers and rescue oligonucleotides see Supplementary Table 1. Scale bar = 5 μm.

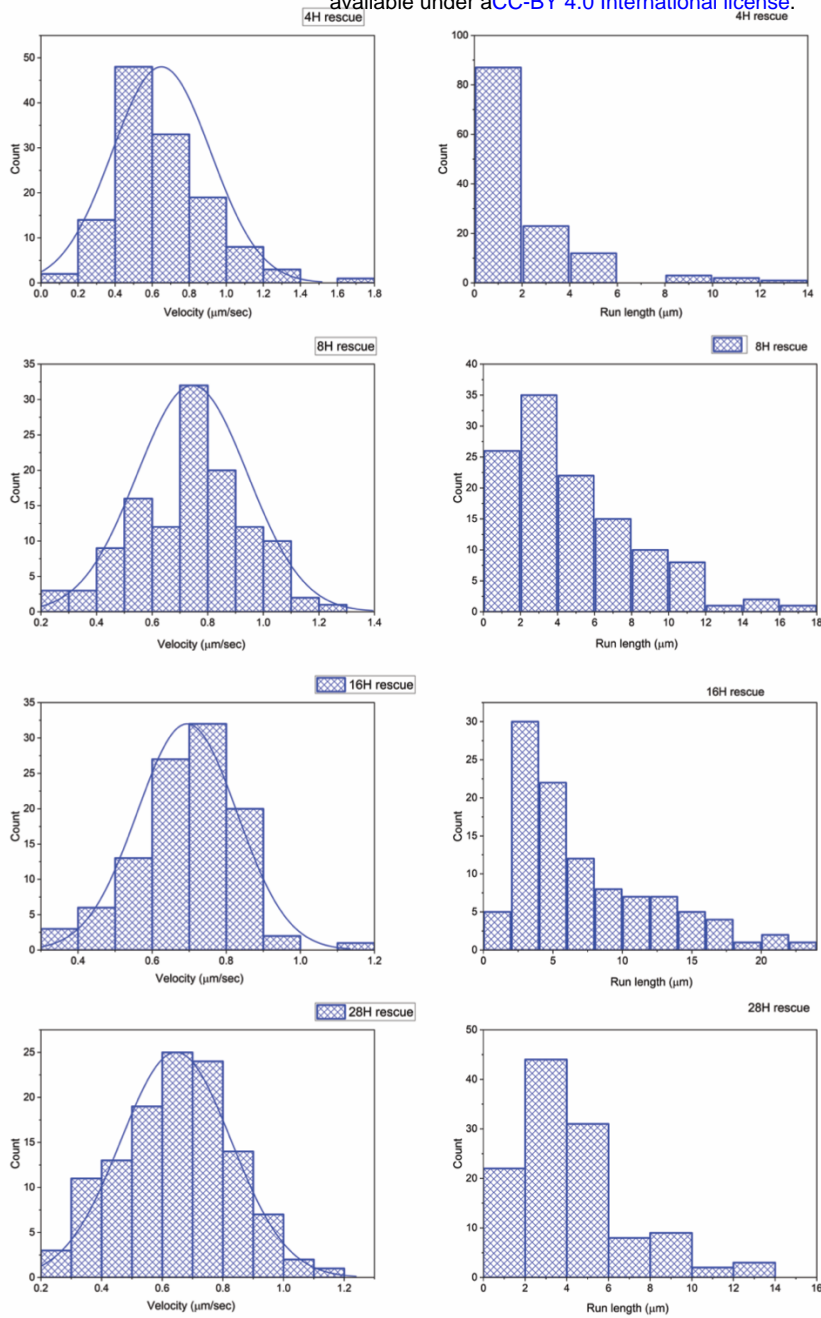

**Supplementary Figure 7: Histograms and kymographs of KIF1A ensembles with flexible and rescue linkers. A.** Velocity and processivity histograms of 6HB-400nm 4-28H KIF1A monomer ensembles with flexible and flexible-rescue oligonucleotides, for the data shown in Figure 4.
